# Supplementary material
Source: publisher site journal article supplement (https://www.dovepress.com/article/499606)
Supplement: Supplementary file 1 [file get_supplementary_file.php]

**Supplementary table 1** Results of expert consultation on oral MMPI nursing training course for ICU nurses in the secondary round of Delphi expert consultation.

| Items for the primary, secondary and tertiary indicators | Score of importance | Coefficient of variation |
| --- | --- | --- |
| Ⅰ-1 Professional Knowledge | 3.50±0.52 | 0.15 |
| Ⅱ-1 Definition and classification of medical device-related pressure injuries | 4.42±0.52 | 0.12 |
| Ⅲ-1 Diagnostic criteria and common causes of medical device-related pressure injuries | 3.92±0.79 | 0.20 |
| III-2 Clinical staging and evaluation methods of oral MMPI | 3.67±0.78 | 0.21 |
| II-2 Selection and use of medical devices | 3.92±0.79 | 0.20 |
| III-3 Evaluate the purpose and function of the device and select the appropriate type, material and model of medical device | 4.00±0.60 | 0.15 |
| III-4 Select and use preventive dressings | 4.35±0.84 | 0.22 |
| Ⅲ-5 Correctly wear and fix the medical device with appropriate tightness to avoid excessive pressure | 3.83±0.72 | 0.19 |
| II-3 Current status and research progress of oral MMPI at home and abroad | 3.58±0.67 | 0.19 |
| III-6 Interpretation of the updated skin management guidelines | 3.83±0.72 | 0.19 |
| III-7 Interpretation of the management standards for oral MMPI in patients with endotracheal intubation | 3.92±0.67 | 0.17 |
| III-8 Incidence and common sites of oral MMPI | 4.25±0.62 | 0.15 |
| III-9 Analysis of high-risk populations and influencing factors for oral MMPI | 4.00±0.85 | 0.21 |
| II-4 Medication management strategy for patients with endotracheal intubation | 3.67±0.78 | 0.21 |
| III-10 Strategies for using sedatives, anticoagulants and vasoactive drugs in patients with endotracheal intubation | 4.08±0.79 | 0.19 |
| II-5 Nutrition management strategy for patients with endotracheal intubation | 3.67±0.78 | 0.21 |
| III-11 Assessment of nutritional status and implementation in patients with endotracheal intubation | 3.92±0.67 | 0.17 |
| II-6 Posture management strategy for patients with endotracheal intubation | 3.50±0.52 | 0.15 |
| III-12 Strategies for preventing oral MMPI in patients with endotracheal intubation during ventilation in a prone position | 3.67±0.79 | 0.21 |
| II-7 Early withdrawal of mechanical ventilation strategy for patients with endotracheal intubation | 4.08±0.52 | 0.13 |
| Ⅲ-13 Regularly assess the necessity of ventilators and endotracheal intubation, and wean and extubate as soon as possible | 3.75±0.75 | 0.20 |
| II-8 Humanistic care strategy for patients with endotracheal intubation | 3.75±0.75 | 0.20 |
| III-14 Effective communication and psychological support for patients with endotracheal intubation | 3.83±0.72 | 0.19 |
| I-2 Practical Skills | 3.92±0.67 | 0.17 |
| II-9 Assessment content, operation purpose and precautions in oral care | 3.75±0.75 | 0.20 |
| III-15 Master the standard operation process of oral care | 4.08±0.90 | 0.22 |
| II-10 Selection and function of oral care solution. | 3.75±0.62 | 0.17 |
| III-16 Be familiar with the role and application of oral care solutions | 3.67±0.79 | 0.21 |
| III-17 Correctly select and use oral cleaning utensils | 4.25±0.75 | 0.18 |
| II-11 Material and size selection of endotracheal tube | 3.50±0.80 | 0.22 |
| III-18 Measurement method of endotracheal tube length and material selection. | 4.25±0.62 | 0.15 |
| II-12 Methods of securing the endotracheal tube | 4.42±0.67 | 0.15 |
| III-19 Tips for fixing the endotracheal tube with a modified dental pad | 4.33±0.65 | 0.15 |
| III-20 Regularly adjust the endotracheal tube position and dental pad in the oral cavity | 4.00±0.85 | 0.21 |
| I-3 Professionalism | 3.67±0.65 | 0.18 |
| II-13 Methods and techniques of literature retrieval | 3.75±0.75 | 0.20 |
| III-21 Master the search methods of commonly used Chinese and English databases | 3.67±0.65 | 0.18 |
| III-22 Understand the commonly used Chinese and English databases in nursing and their characteristics | 4.08±0.67 | 0.16 |
| III-23 Be familiar with the purpose, function, and method of literature retrieval | 3.92±0.79 | 0.20 |
| II-14 Ways to obtain the latest guidelines and expert consensus | 3.58±0.52 | 0.14 |
| III-24 Search strategy for Yimaitong Guideline | 4.00±0.85 | 0.21 |
| II-15 Application of critical thinking in clinical practice | 3.50±0.67 | 0.19 |
| III-25 Critical thinking helps ICU nurses make effective decisions | 4.00±0.85 | 0.21 |
| II-16 Communication strategies for multidisciplinary teams | 3.58±0.79 | 0.22 |
| III-26 ICU nurses' Roles and functions in the multidisciplinary skin management team | 3.92±0.67 | 0.17 |

Note: MMPI: mucosal membrane pressure injury; ICU: intensive care unit
